# Supplementary material
Source: Springer Nature journal article supplement (https://www.springermedizin.de/resource/supplementary/12906_2012_1162_MOESM1_ESM.pdf/9519972)
Supplement: MOESM1 [file 9519972]

25 of records identified through  
database searching

- 7 Medline
- 3 Cochrane
- 9 Embase
- 0 Cambase
- 6 PsychInfo

15 of records after  
duplicates removed

3 of full-text articles  
assessed for eligibility

3 of studies included in  
qualitative synthesis

12 of records excluded

- 3 no MBSR
- 2 no low back pain
- 7 no RCT
